# Supplementary material for: G9a Inhibition Enhances Checkpoint Inhibitor Blockade Response in Melanoma
Source: Oxford University Press journal article supplement (doi:10.1158/1078-0432.ccr-20-3463), 2021-02-15
Supplement: 10780432ccr203463-sup-250729_3_supp_6879919_qnzgtm.docx [file 10780432ccr203463-sup-250729_3_supp_6879919_qnzgtm.docx]

Supplementary Information for

**Epigenetic reactivation of LC3B induces melanoma cell death and predicts response to immunotherapy**

Gregory M. Kelly1,2, Fares Al-Ejeh1,†, Robert McCuaig1, Francesco Casciello1,4, Nabilah Ahmad Kamal1, Blake Ferguson1, Antonia L. Pritchard1, Sayed Ali3,5, Ines P. Silva6,7,8, James S. Wilmott6,7,8, Georgina V. Long6,7,8,9,10, Richard A. Scolyer6,7,8,9,11, Sudha Rao1, Nicholas K. Hayward1, Frank Gannon1 and Jason S. Lee1,2,4 *.

Jason Lee

Email: Jason.Lee@qimrberghofer.edu.au

**This file includes:**

Supplementary Figures S1 to S10


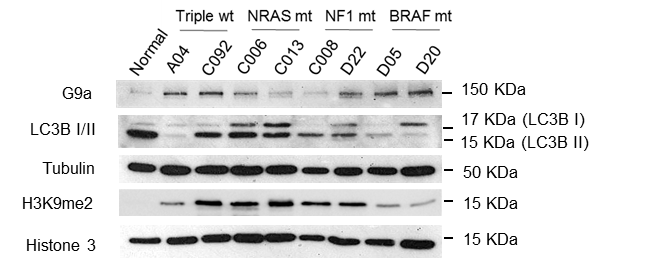


A

**B**

**A**

B


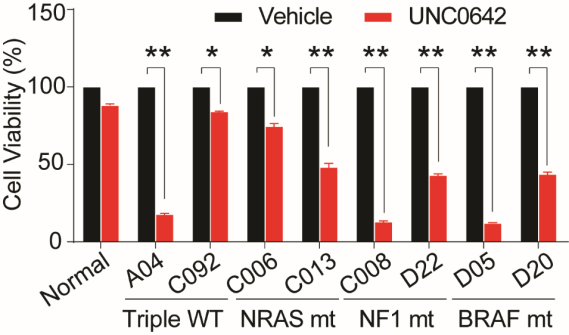


C

**
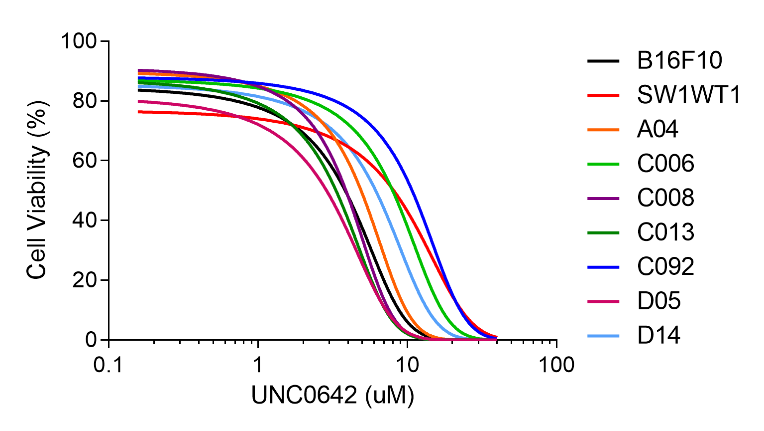
**

**Supplementary Figure S1. G9a inhibition induces melanoma cell death.** (**A**)Immunoblotting analysis of basal levels of G9a, LC3B I/II and H3K9me2 from various melanoma cell lines as well as normal melanocytes. Tubulin and Total Histone 3 levels were used as loading controls. (**B**) Melanoma cell lines were treated with either vehicle (DMSO) or 5 µM of UNC0642 for 48 hours and cell viability was measured by MTT assay against normal melanocytes. (**C**) IC50 curves showing dose-response of various cell lines to UNC0642 treatment (48 h). Data is presented as the mean ± SEM, significant comparisons were determined by unpaired t-test and indicated as follows: **P* < 0.05, ***P* < 0.01, (all experiments were performed twice with between 3 and 6 replicates per experiment).


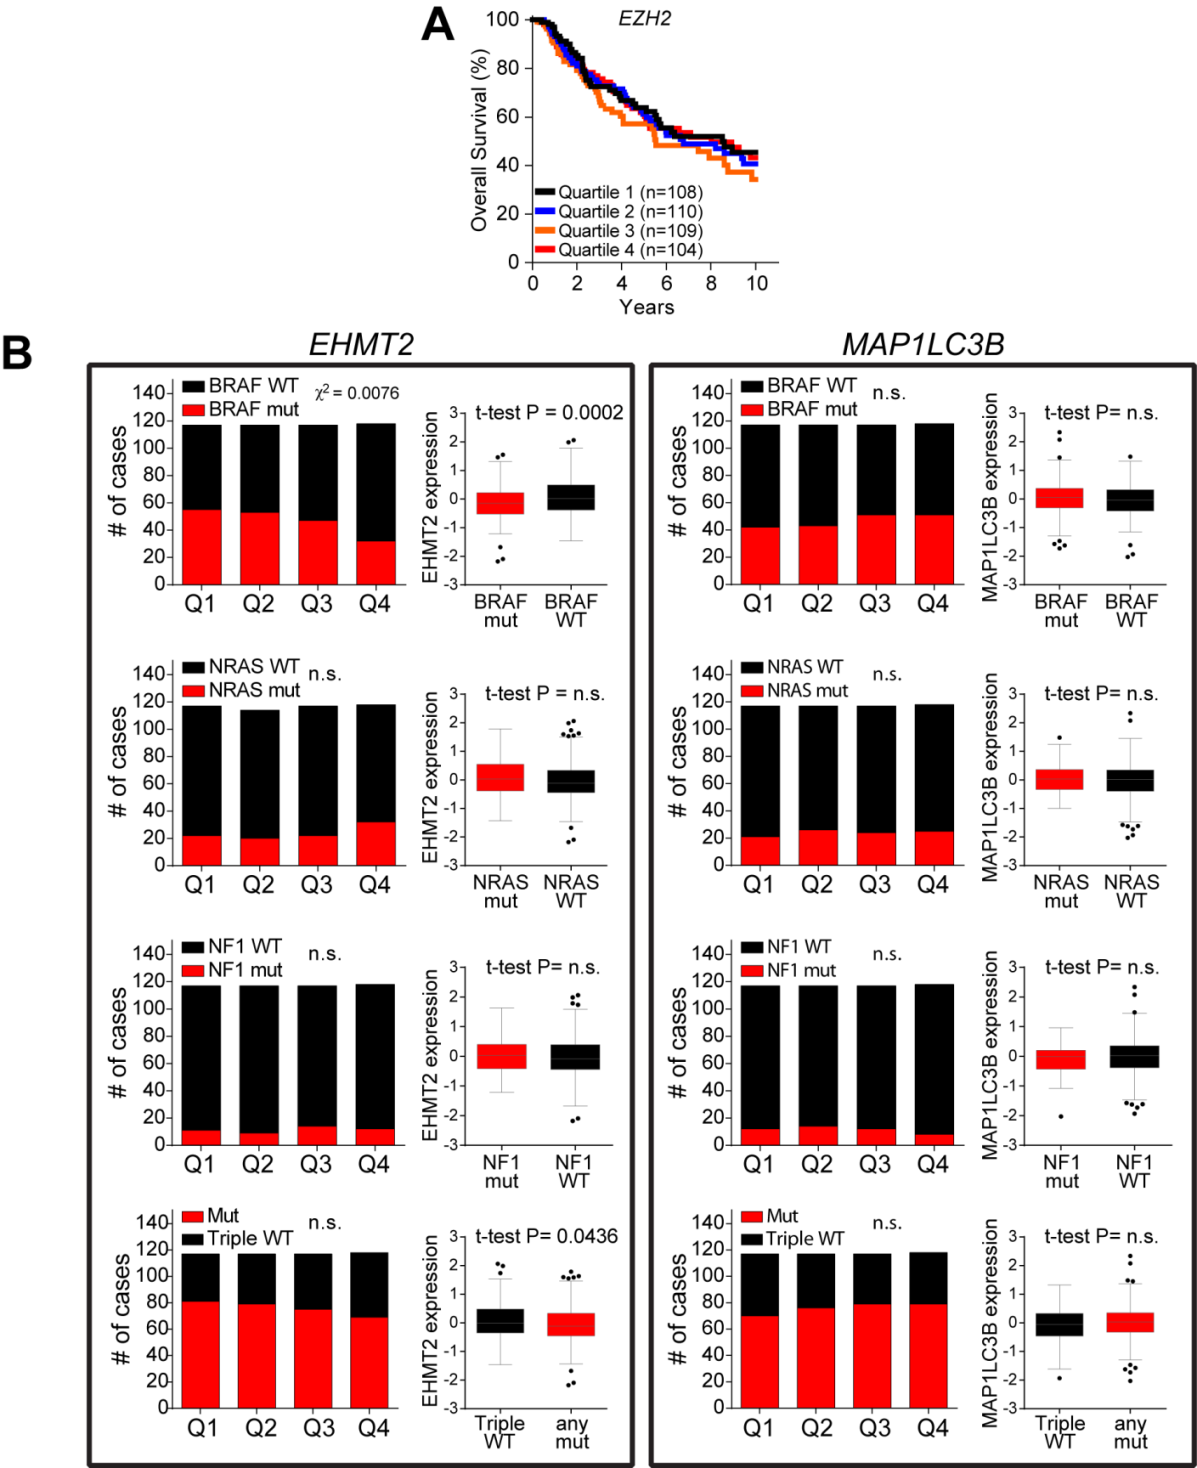


**Supplementary Figure S2. Stratification by melanoma mutational types.** Melanoma patients in the TCGA cohort were stratified according to *EHMT2* (G9a) or *MAP1LC3B* (LC3B) mRNA expression.Groups are based on quartiles of expression defined as: 1st Quartile (Q1: bottom 25%), 2nd Quartile (Q2: 25 – 50%), 3rd Quartile (Q3: 50 – 75%) and 4th quartile (Q4: top 25%). These groups were compared for the penetrance of BRAF, NRAS or NF1 mutations or whether cases are wild type for these three genes (triple WT) or mutant for any of these genes (any mut). Chi-squared test was used (GraphPad Prism). Box plots show the comparison of *EHMT2* or *MAP1LC3B* expression in mutant vs. wild type melanoma cases.

**
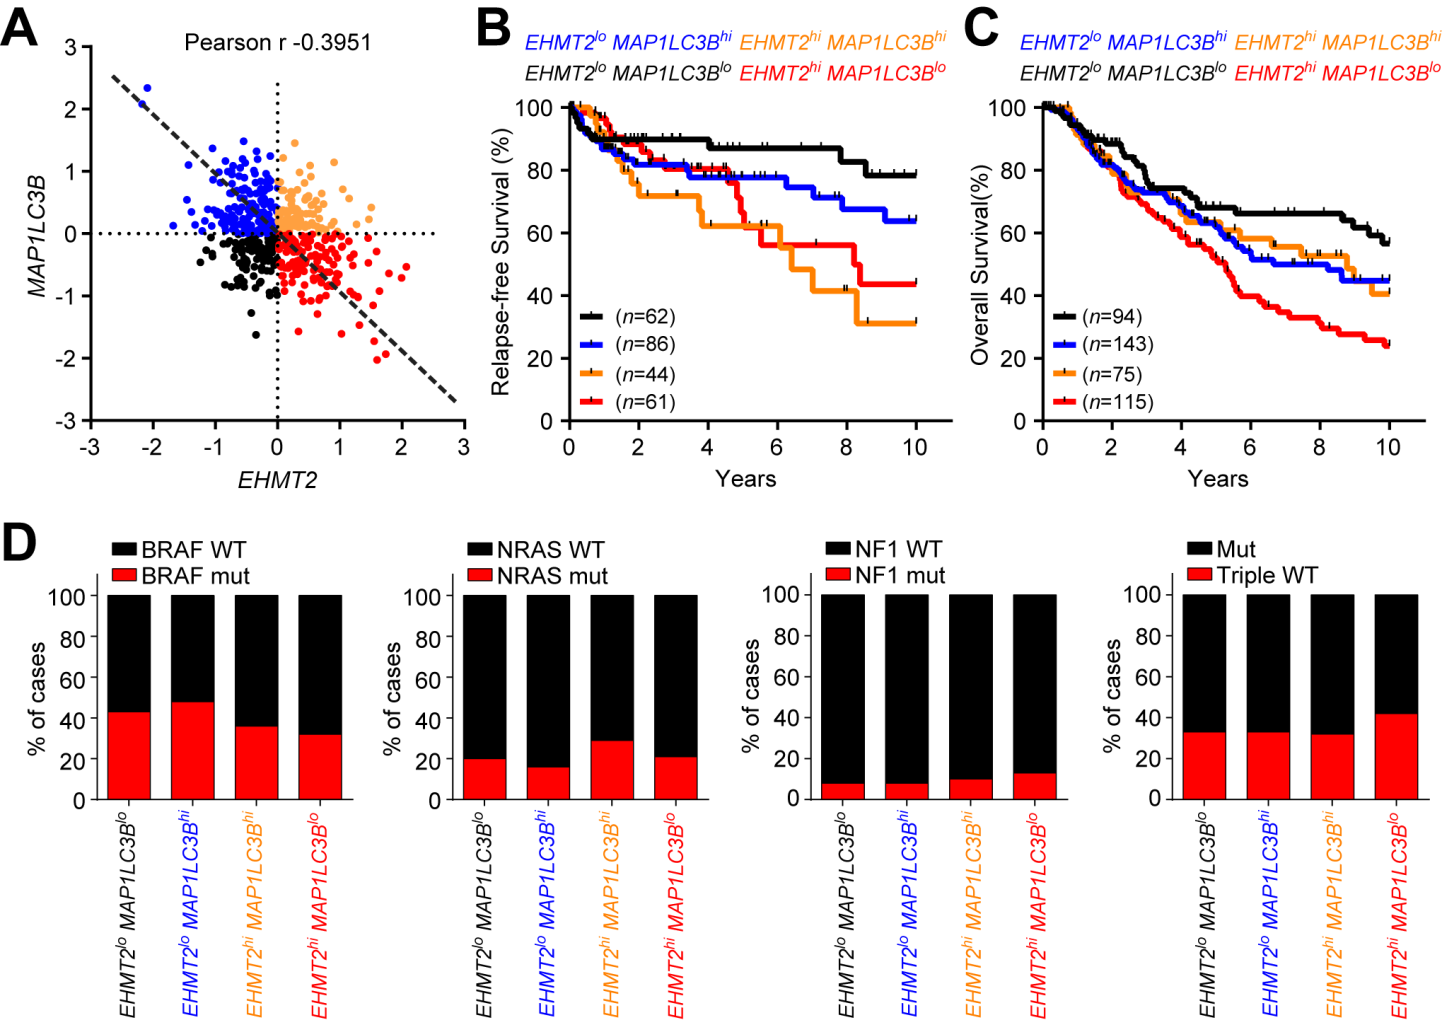
**

*P* < 0.0001

*P* = 0.0025

*P* = 0.006

**Supplementary Figure S3. Association of High *EHMT2* and low *MAP1LC3B* expression with the worst survival in melanoma patients in TCGA RNA-seq dataset.** (**A**) Expression of *EHMT2* (G9a) and *MAP1LC3B* mRNA (z-scores) in the TCGA melanoma patient cohort (n=473). Pearson correlation coefficient (Pearson r) and *P* value (two-tailed) were generated by GraphPad Prism. Patients were grouped according to their *EHMT2* and *MAP1LC3B* mRNA expression; red: *EHMT2* high/*MAP1LC3B* low (*EHMT2*hi/*MAP1LC3B*lo), orange: *EHMT2* high/*MAP1LC3B* high (*EHMT2*hi/*MAP1LC3B*hi), blue (*EHMT2*lo/*MAP1LC3B*hi) and black (*EHMT2*lo/*MAP1LC3B*lo). Relapse-free (**B**) and overall (**C**) survival of melanoma patients with four different expression patterns of *EHMT2* (G9a) and *MAP1LC3B* as defined in (**A**). Log-rank *P* values and the number of patients in each group are reported. (**D**) Comparison of BRAF, NRAS, NF1 and Triple WT mutation status across the four *EHMT2*/*MAP1LC3B* expression groups. Chi-squared test was used (GraphPad Prism).


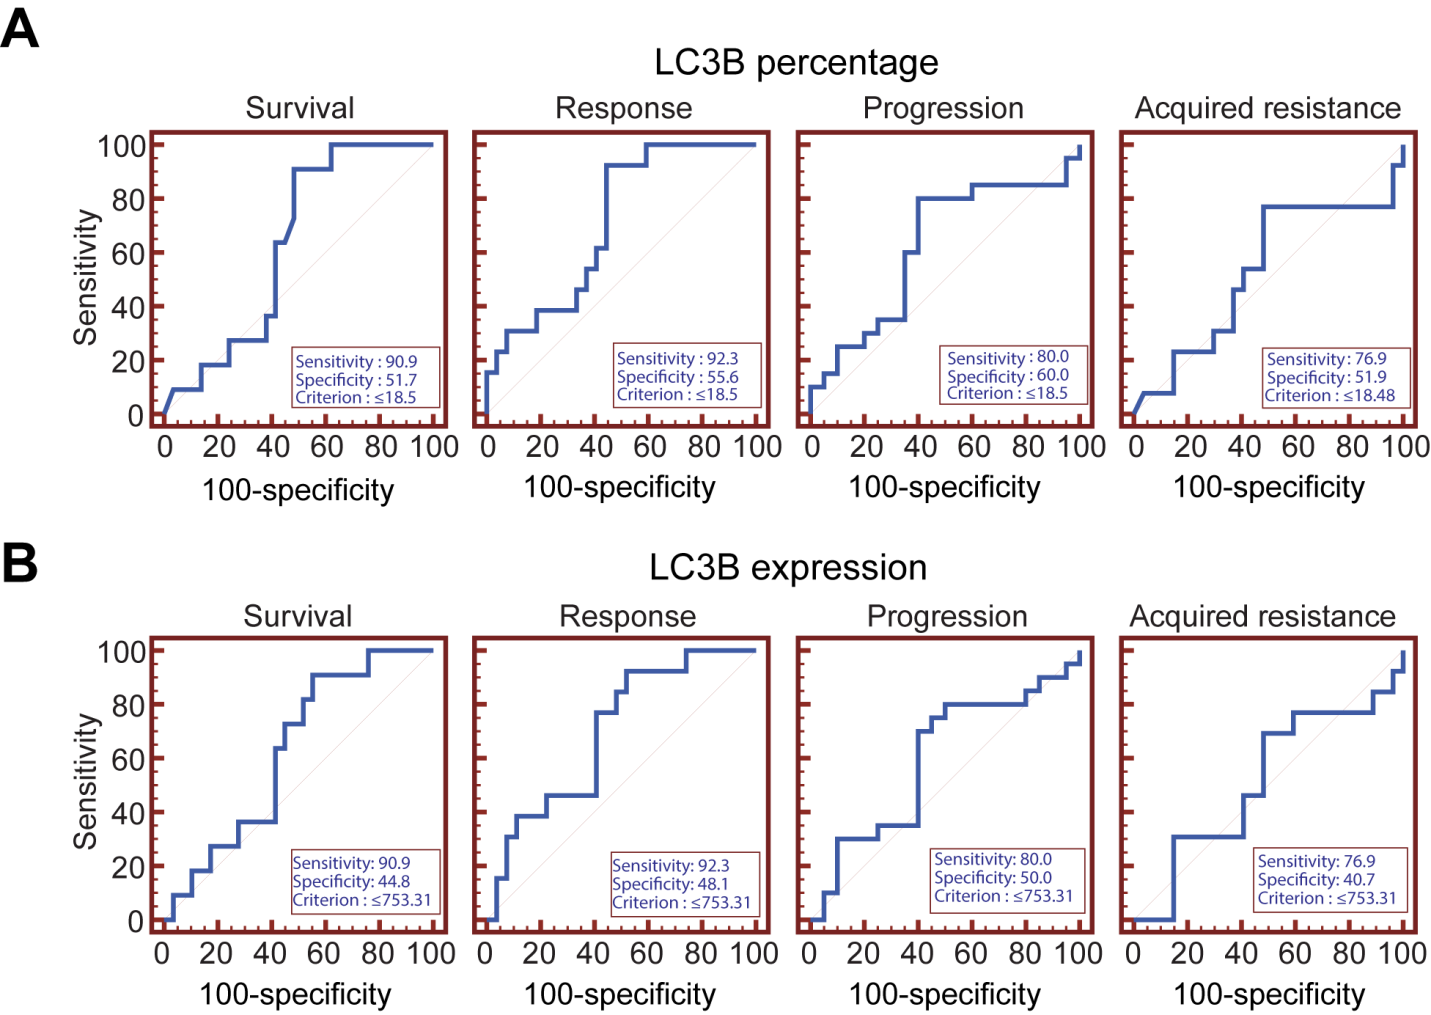


**Supplementary Figure S4.** **Receiver Operator Characteristic (ROC) curves of LC3B as a predictor of outcome in melanoma patients treated with immunotherapy**. ROC curves were constructed using MedCalc® (version 12.7) for all the endpoints available in our cohort including survival (dead vs. alive), response (initial SD/PD vs. CR/PR), progression (*de novo* or acquired PD vs. rest), and acquired resistance (acquired PD vs. rest). The endpoint analysis is displayed for (**A**), the percentage of LC3-positive cells (% LC3B+ cells) or (**B**)**,** absolute LC3B staining intensity (LC3B expression).


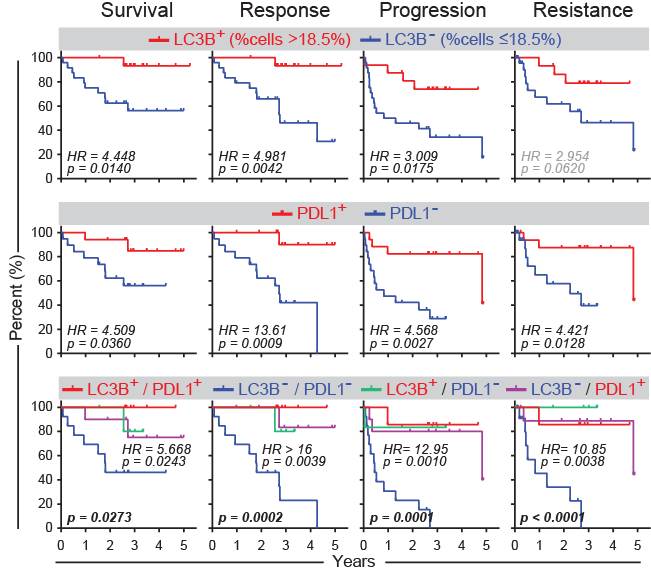


**Supplementary Figure S5. LC3B and PDL1 as prognostic markers in melanoma.** Kaplan Meier curves are shown for overall survival, response (Complete Response (CR) or Partial Response (PR)), progression (de novo or post-response), and for acquired resistance (Progressive Disease (PD) after initial response) for LC3B positive (%cells >18.5%) vs negative (%cells ≤18.5%), PDL1 positive (>1% staining) vs negative as well as the combination of both. Hazard ratios and *P*-values from log rank (Mantel-Cox) test using GraphPad Prism are shown for each plot.

**Supplementary Figure S6.** **G9a inhibition modulates autophagic processes.** Immunofluorescence analysis of mCherry-EGFP-LC3B puncta in the D05 melanoma cell line treated with either vehicle (DMSO), UNC0642 (5 µM, 8 and 48 h) or Baf.A1 (20 nM, 8h). All cells in the Baf.A1 treated wells were dead at 48 hrs. Scale bar represents 200 µm.

**Supplementary Figure S7. Quantitative RT-PCR analysis of *MAP1LC3B* and *CD274* gene expression**. Quantitative RT-PCR analysis of *MAP1LC3B* and *CD274* (PD-L1) gene expression from D20 cell line (*in vitro*) or tumors resected from mice (*in vivo*) treated with either vehicle (DMSO) or UNC0642 (either 5 μM for 24 hours or 5 mg/kg every 2 days for 14 days). The results are expressed as fold change compared to vehicle (DMSO). Data is presented as the mean ± SEM, significant comparisons were determined by unpaired t-test and indicated as follows: ***P* < 0.01, *****P* < 0.0001, (all experiments were performed at least twice with 3 replicates per experiment).

**Supplementary Figure S8.** **G9a inhibition induces melanoma cell death in SM1WT1 mouse model.** (**A**) Groups of C57BL/6J mice (n=4-5) were subcutaneously injected with SM1WT1 mouse melanoma cells (1 x 105) on day 0. Tumor bearing mice were treated with vehicle (DMSO and IgG isotype control), UNC0642 (5 mg/kg and 250 µg of IgG), anti-PD-1 (250 µg and DMSO) or UNC0642 (5 mg/kg) and anti-PD-1 (250 µg per mouse) intraperitoneally every two days for UNC0642 or every four days for the anti-PD-1 or IgG control for two weeks. Tumor growth was measured using a digital caliper, and tumor volumes are represented as mean ± SEM. (**B**) Tumor weight at end-point shown for all four treatments represented as mean ± SEM. (**C**) Immunoblotting analysis of basal levels of mouse LC3B and G9a in the SM1WT1 and B16F10 cell lines against Normal human melanocytes. Tubulin was used as a loading control. Statistical differences in tumor volumes were determined by Kruskal-Wallis test (**P* < 0.05, ***P* < 0.01, ****P*< 0.005).

**Supplementary Figure S9.** **RNA-based phenotypes of cutaneous melanoma.** (**A**) *EHMT2* and *MAP1LC3B* expression in melanoma patient samples from the TCGA melanoma RNA-seq dataset subdivided into the three melanoma molecular subtypes: “Immune”, “Keratin” and “MITF-low”. (**B**) *EHMT2* and *MAP1LC3B* expression in melanoma patient samples from the TCGA melanoma RNA-seq dataset stratified into four expression-based molecular subclasses labelled as “Oxidative phosphorylation”, “Oestrogen response/p53-pathway”, “Immune” and “Cell cycle” based on their dominantly expressed biological pathways determined by gene set enrichment analysis (GSEA). Data is presented as the mean, significant comparisons were determined by Kruskal-Wallis test and indicated as follows: ***P* < 0.01, ****P* < 0.005.

**Supplementary Figure S10.** **Gene Set Enrichment Analysis**. Enrichment plots of the top two pathways identified by GSEA analysis of RNA-seq data from DO5 melanoma cells treated with 5 µM of UNC0642 for 8 hours identified the TNFA signaling via NFKB and interferon gamma response pathways.
